# Supplementary material for: The joint influence of break and noise variance on the break detection capability in time series homogenization
Source: Copernicus journal article supplement (doi:10.5194/ascmo-4-1-2018), 2018-08-22
Supplement: Supplementary file [file ascmo-4-1-2018-supplement-title-page.pdf › ascmo-4-1-2018-supplement-title-page.pdf]

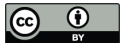

## *Supplement of*

# **The joint influence of break and noise variance on the break detection capability in time series homogenization**

**Ralf Lindau and Victor Karel Christiaan Venema**

*Correspondence to:* Ralf Lindau ([rlindau@uni-bonn.de](mailto:rlindau@uni-bonn.de))

- [ascmo-4-1-2018-supplement-title-page.pdf](#)
- [Fig01.for](#)
- [Fig02.for](#)
- [Fig03.for](#)
- [Fig04.for](#)
- [Fig05.for](#)
- [Fig06.for](#)
- [Fig07.for](#)
- [Fig08a.for](#)
- [Fig08b.for](#)
- [Fig09.for](#)
- [Fig10.for](#)
- [Fig11.for](#)
- [Fig12.for](#)
- [Fig13.for](#)
- [Fig13c.for](#)
- [Readme.docx](#)

The copyright of individual parts of the supplement might differ from the CC BY 4.0 License.
